# Supplementary material for: Histological Stratification of Thick and Thin Plaque Psoriasis Explores Molecular Phenotypes with Clinical Implications
Source: PLOS journal article supplement (doi:10.1371/journal.pone.0132454), 2015-07-15
Supplement: S1 (10.1371/journal.pone.0132454.s001) [file journal.pone.0132454.s001]

## SUPPLEMENTARY FIGURES

### Predictor Importance

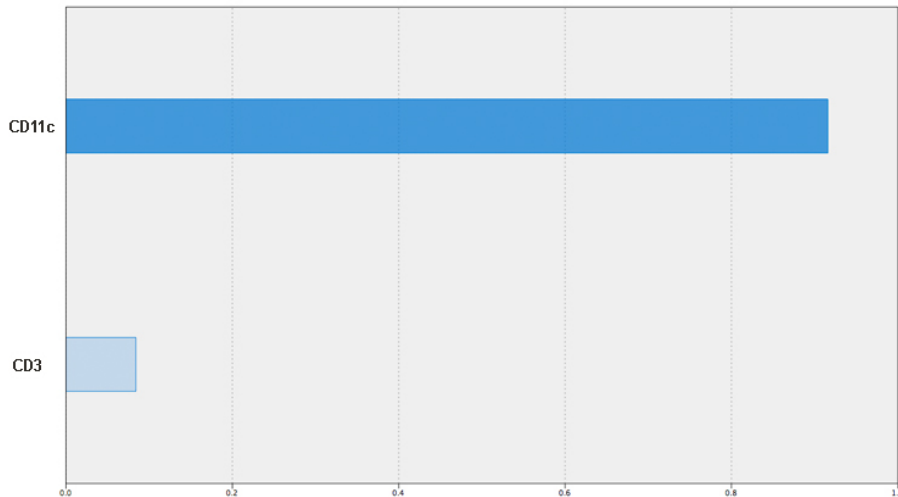

### Effects

| Source                | Sum of Squares | df  | Mean Square   | F       | Sig. | Importance |
|-----------------------|----------------|-----|---------------|---------|------|------------|
| Corrected Model ▼     | 2,218,978.948  | 2   | 1,109,489.474 | 100.911 | .000 |            |
| CD11C_DER_transformed | 645,558.754    | 1   | 645,558.754   | 58.715  | .000 | 0.916      |
| CD3_DER_transformed   | 59,233.222     | 1   | 59,233.222    | 5.387   | .022 | 0.084      |
| Residual              | 1,396,329.849  | 127 | 10,994.723    |         |      |            |
| Corrected Total       | 3,615,308.796  | 129 |               |         |      |            |

### Coefficients

| Model Term            | Coefficient ▼ | Std.Error | t     | Sig. | 95% Confidence Interval |        | Importance |
|-----------------------|---------------|-----------|-------|------|-------------------------|--------|------------|
|                       |               |           |       |      | Lower                   | Upper  |            |
| Intercept             | 68.388        | 14.143    | 4.836 | .000 | 40.402                  | 96.374 |            |
| CD11C_DER_transformed | 0.836         | 0.109     | 7.663 | .000 | 0.620                   | 1.052  | 0.916      |
| CD3_DER_transformed   | 0.252         | 0.109     | 2.321 | .022 | 0.037                   | 0.468  | 0.084      |

**S1 Fig. Forward stepwise linear regression model to predict epidermal thickness.** To confirm the validity of clinical stratification by epidermal thickness, numbers of CD3<sup>+</sup> cells, CD11c<sup>+</sup> cells, DC-LAMP<sup>+</sup> cells, and BDCA<sup>+</sup> cells in the dermis are entered as determining pathogenic factors of psoriasis. Among 4 explanatory variables, number of CD11c<sup>+</sup> dendritic cells and CD3<sup>+</sup> T cells correlated with epidermal thickness (correlation coefficients; CD11c<sup>+</sup> cells = 0.836, CD3<sup>+</sup> cells = 0.252,  $p < 0.05$ ).
